# Supplementary material for: Systematic analysis of CNGA3 splice variants identifies different mechanisms of aberrant splicing
Source: PubMed Central journal article supplement (PMC9938885; doi:10.1038/s41598-023-29452-9), 2023-02-18
Supplement: 41598_2023_29452_MOESM1_ESM.pdf [file 41598_2023_29452_MOESM1_ESM.pdf]

## Supplementary Data

**Title: Systematic analysis of *CNGA3* splice variants identifies different mechanisms of aberrant splicing**

**Authors: Peggy Reuter, Magdalena Walter, Susanne Kohl, and Nicole Weisschuh**

**Supplementary Table S1: Primers for wildtype minigene constructs**

| Primer name                             | Sequence (5'→3')                                  | Amplicon size (bp) |     | Flanking intronic region (upstream/downstream bp) |
|-----------------------------------------|---------------------------------------------------|--------------------|-----|---------------------------------------------------|
| <i>CNGA3</i> -exon 2-<br><i>NotI</i>    | <b>TATATATAGCGGCCGCGCCCTTCATTTATTTATTCATTCACT</b> | 700                |     | 287/275                                           |
| <i>CNGA3</i> -exon 2-<br><i>BamHI</i>   | <b>TATATATAGGATCCGCTGCATTTGAGTCTTCATTTTCT</b>     |                    |     |                                                   |
| <i>CNGA3</i> -exon 3-<br><i>NotI</i>    | <b>TATATATAGCGGCCGCGCCAGGCCAGCATGTACT</b>         | 693                |     | 269/310                                           |
| <i>CNGA3</i> -exon 3-<br><i>BamHI</i>   | <b>TATATATAGGATCCTGGCTGCTCTTACCACCTTC</b>         |                    |     |                                                   |
| <i>CNGA3</i> -exon 4-<br><i>NotI</i>    | <b>TATATATAGCGGCCGCCCTGCACCTTGGCAGTCATAA</b>      | 850                |     | 379/291                                           |
| <i>CNGA3</i> -exon 4-<br><i>BamHI</i>   | <b>TATATATAGGATCCGATTTCCAGGGGACCCTAAC</b>         |                    |     |                                                   |
| <i>CNGA3</i> -exon 5-<br><i>NotI</i>    | <b>TATATATATAGCGGCCGCGTAACTAATCACAAAGCATTTTGG</b> | 487                |     | 183/250                                           |
| <i>CNGA3</i> -exon 5-<br><i>BamHI</i>   | <b>TATATATATAGGATCCCTTTATGGATGAGAAAAATGAGAG</b>   |                    |     |                                                   |
| <i>CNGA3</i> -exon 4-5-<br><i>NotI</i>  | <b>TATATATAGCGGCCGCCCTGCACCTTGGCAGTCATAA</b>      | 3834               |     | 379/188                                           |
| <i>CNGA3</i> -exon 4-5-<br><i>BamHI</i> | <b>TATATATAGGATCCATCTCATCCCTCCCCGACTT</b>         |                    |     |                                                   |
| <i>CNGA3</i> -exon 6-<br><i>NotI</i>    | <b>TATATATAGCGGCCGCAAGGGTGTGGATGTTGTCGT</b>       | 687                |     | 291/279                                           |
| <i>CNGA3</i> -exon 6-<br><i>BamHI</i>   | <b>TATATATAGGATCCCTGCATCCTCCTCGTACA</b>           |                    |     |                                                   |
| <i>CNGA3</i> -exon 7-<br><i>NotI</i>    | <b>TATATATAGCGGCCGCCCTGGAAAACGGTACCTCCT</b>       | 686                |     | 295/284                                           |
| <i>CNGA3</i> -exon 7-<br><i>BamHI</i>   | <b>TATATATAGGATCCCAAGAACAAGGCCCAGAGAG</b>         |                    |     |                                                   |
| <b>Hybrid construct for exon 8</b>      |                                                   |                    |     |                                                   |
| <i>CNGA3</i> -exon 8-<br><i>NotI</i>    | <b>TATATATAGCGGCCGCGCCCTCTGTCACTTTTTGA</b>        | 284                |     | 378/284                                           |
| Overlap extension<br>reverse            | cctggggcacactcacCTTTAAGTAAGCCAGGTCCGGT            |                    |     |                                                   |
| Overlap extension<br>forward            | ACCGACCTGGCTTACTTAAAGgtgagtgtgccccagg             | 500                | 784 |                                                   |
| <i>CNGA3</i> -exon 7-<br><i>BamHI</i>   | <b>TATATATAGGATCCCAAGAACAAGGCCCAGAGAG</b>         |                    |     |                                                   |

Binding sites for restriction enzymes are indicated in italics. 5'-extension tails to the restriction sites are indicated in bold.

**Supplementary Table S2:** Primers used for site-directed mutagenesis

| Primer name               | Sequence (5'→3')                              |
|---------------------------|-----------------------------------------------|
| CNGA3_IVMc.101+1G>A_F     | GAAAATGGCCTCAGCAGataagatgggctaagatgg          |
| CNGA3_IVMc.101+1G>A_R     | ccatcttagcccatcttat <b>CTGCTGAGGCCATTTTC</b>  |
| CNGA3_IVMc.211G>A_F       | GGCCAGGGGATC <b>ACCAG</b> gtaactgacc          |
| CNGA3_IVMc.211G>A_R       | ggtcagttac <b>CTGGTGATCCCCTGGCC</b>           |
| CNGA3_IVMc.215+11A>G_F    | CAGgtaactgaccggcctcagtcctac                   |
| CNGA3_IVMc.215+11A>G_R    | gtagggactgagg <b>ccggtcagttacCTG</b>          |
| CNGA3_IVMc.395+1G>T_F     | GCAGACAGAGGGAGAAG <b>ttaaggaacggaaaag</b>     |
| CNGA3_IVMc.395+1G>T_R     | cttttcggttccttaa <b>CTTCTCCCTCTGTCTGC</b>     |
| CNGA3_IVMc.395+9C>T_F     | GGGAGAAGgtaaggaatggaaaagaagaaggggc            |
| CNGA3_IVMc.395+9C>T_R     | gccccttctcttttccattccttac <b>CTTCTCCC</b>     |
| CNGA3_IVMc.396-11C>G_F    | gatgttctcttagcttcccagCGCC                     |
| CNGA3_IVMc.396-11C>G_R    | GGCGctgcggaagctagagagaacatc                   |
| CNGA3_IVMc.396-2_398dup_F | cctccccag <b>CGCagCGCCTGGC</b>                |
| CNGA3_IVMc.396-2_398dup_R | GCCAGGCgct <b>GCgctg</b> cggaagg              |
| CNGA3_IVMc.396-4G>A_F     | ctctacctcccacagCGCCTGGCC                      |
| CNGA3_IVMc.396-4G>A_R     | GGCCAGGCGct <b>gtggaaggtagag</b>              |
| CNGA3_IVMc.449+13A>G_F    | gtaagtaccacgcaccacagcagagcc                   |
| CNGA3_IVMc.449+13A>G_R    | ggctctgctgggtg <b>ctg</b> gggtacttac          |
| CNGA3_IVMc.450-15T>G_F    | gcgctgttgtgtaggtgtgggttccagG                  |
| CNGA3_IVMc.450-15T>G_R    | Cctggaaacccacacctacacaaacagcgc                |
| CNGA3_IVMc.450-1G>A_F     | gtatgtgtgggtttccaaGAAGAAGACGAAAAAGAAGG        |
| CNGA3_IVMc.450-1G>A_R     | CCTCTTTTTTCGTCTTCTT <b>Cttg</b> aaaccacacatac |
| CNGA3_IVMc.566+14G>A_F    | gtaagcgacagggatggaaggtgcagcg                  |
| CNGA3_IVMc.566+14G>A_R    | cgctgcaccttccatccctgtcgttac                   |
| CNGA3_IVMc.566+6C>T_F     | CTTATTTGCAGgtaagtacaggggtggaaggtg             |
| CNGA3_IVMc.566+6C>T_R     | cacctccaccctgtcacttac <b>CTGCAAATAAG</b>      |
| CNGA3_IVMc.566G>A_F       | GTATCTGCTTATTTGCA <b>Ag</b> taagcgacaggggtgg  |
| CNGA3_IVMc.566G>A_R       | ccaccctgtcgttac <b>TTGCAAATAAGCAGATAC</b>     |
| CNGA3_IVMc.567-11G>A      | ccatctcccacatagcttctttagGGCC                  |
| CNGA3_IVMc.567-11G>A      | GGCCctaaagaagctatgtgggagatgg                  |
| CNGA3_IVMc.670A>G_F       | GTACGAGCTCGGGCAGgtgagtgtgc                    |
| CNGA3_IVMc.670A>G_R       | gcacactcac <b>CTGCCGAGCTCGTAC</b>             |
| CNGA3_IVMc.671C>G_F       | GTACGAGCTCGGAGAGgtgagtgtgcc                   |
| CNGA3_IVMc.671C>G_R       | ggcactcac <b>CTCTCCGAGCTCGTAC</b>             |
| CNGA3_IVMc.671C>T_F       | GTACGAGCTCGGATAGgtgagtgtgcc                   |
| CNGA3_IVMc.671C>T_R       | gggcactcac <b>CTATCCGAGCTCGTAC</b>            |
| CNGA3_IVMc.673+5G>T_F     | CGGACAGgtgattgtccccagggc                      |
| CNGA3_IVMc.673+5G>T_R     | ggcctggggcacaatcac <b>CTGTCCG</b>             |
| CNGA3_IVMc.674-2A>C_F     | cctcatcttcttcttcgGTTTTCTCGAGCAAG              |
| CNGA3_IVMc.674-2A>C_R     | CTTGCTCGAGAAAACcgaagaagaagatggagg             |

Intronic nucleotides are indicated in lowercase letters, exonic nucleotides in capital letters. The introduced nucleotides are indicated in bold. F, forward; R, reverse.

## Supplementary Figure S1

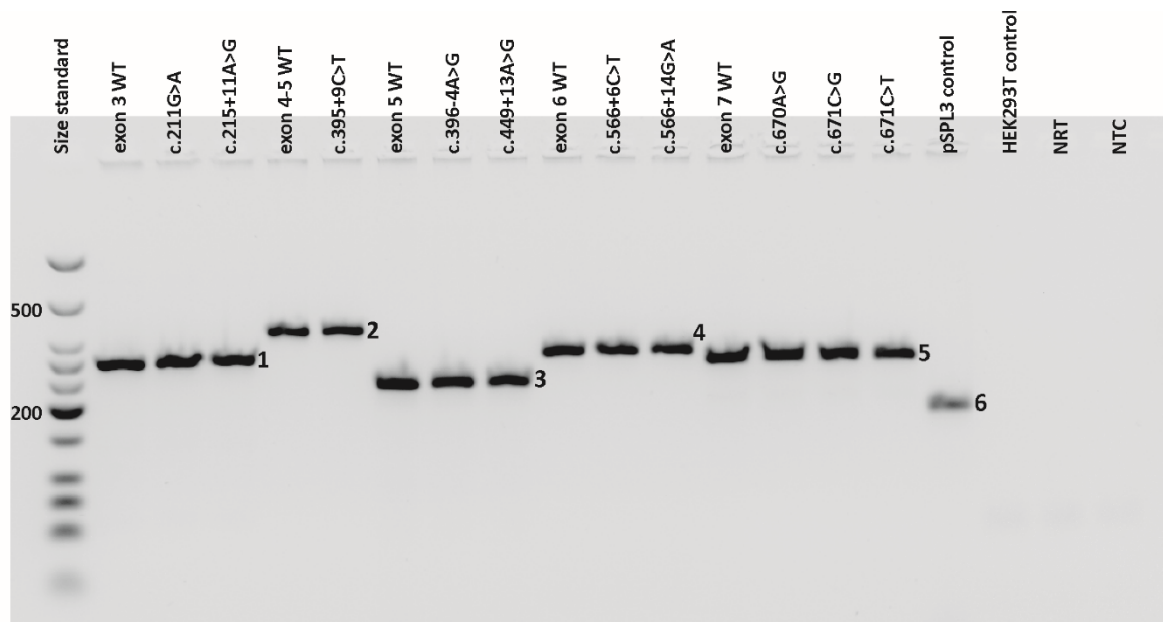

**Product 1: Transcript from exon 3 minigenes**  
(WT, c.211G>A and c.215+11A>G)

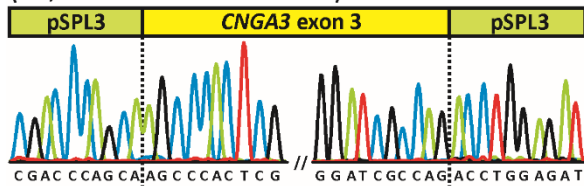

**Product 2: Transcript from exon 4-5 minigenes**  
(WT and c.395+9C>T)

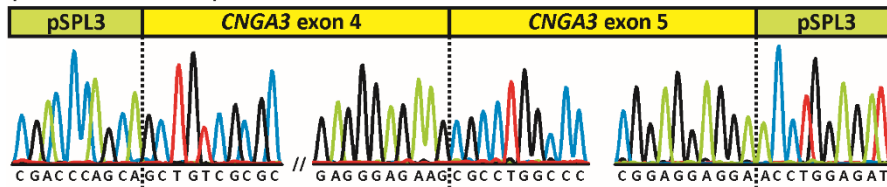

**Product 3: Transcript from exon 5 minigenes**  
(WT, c.396-4G>A and c.449+13A>G)

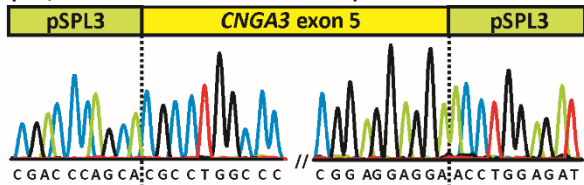

**Product 4: Transcript from exon 6 minigenes**  
(WT, c.566+6C>T and c.566+14G>A)

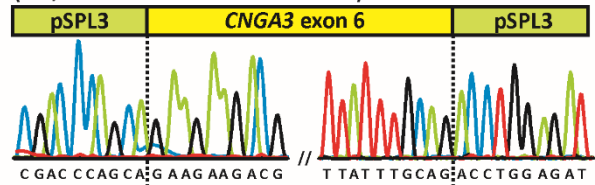

**Product 5: Transcript from exon 7 minigenes**  
(WT, c.670A>G, c.671C>G, and c.671C>T)

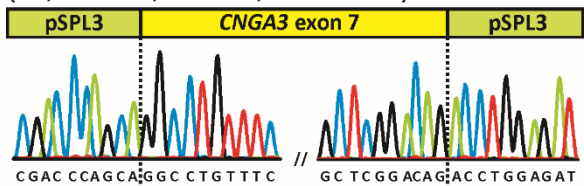

**Product 6: Transcript from empty pSPL3**

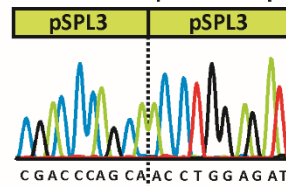

Supplementary Figure S2

Figure 2A transcript 1: Correct splicing (exon 2 wild-type minigene)

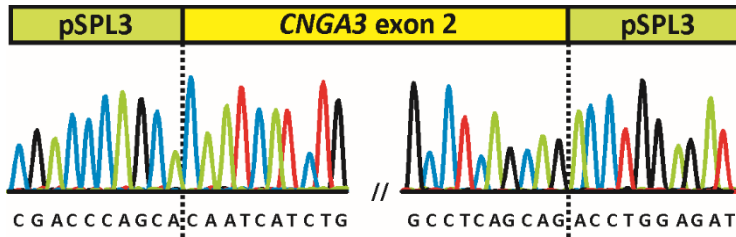

Figure 2A transcript 2: Deletion of the last 15 nucleotides of exon 2 (c.101+1G>A minigene)

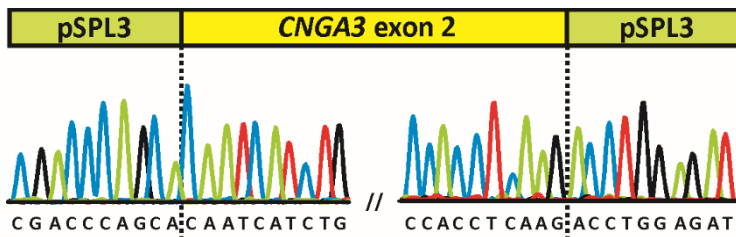

Figure 2B transcript 1: Correct splicing (exon 4-5 wild-type minigene)

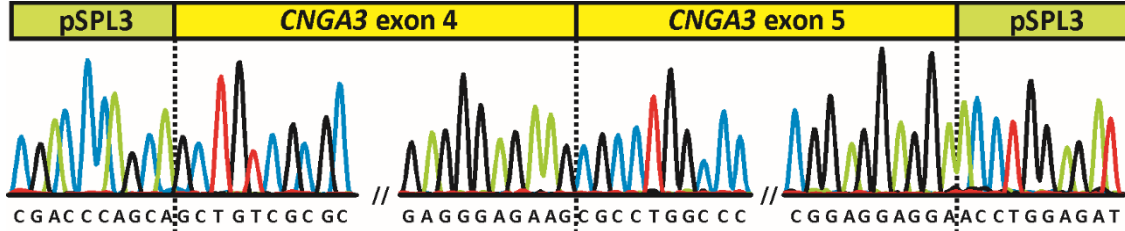

Figure 2B transcript 2: Retention of the first 488 nucleotides of intron 4 (c.395+1G>A minigene)

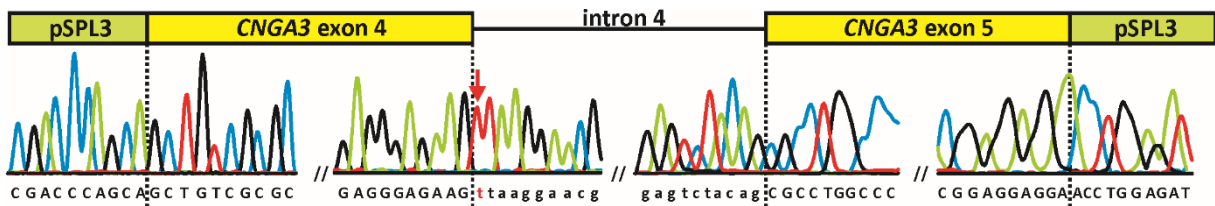

Figure 2B transcript 3: Deletion of the last 41 nucleotides of exon 4 (c.395+1G>A minigene)

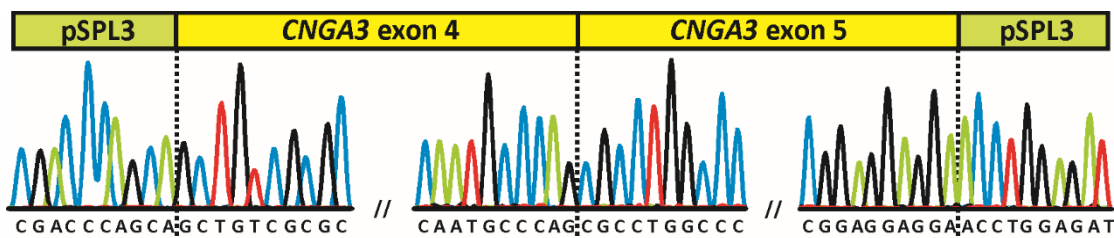

Figure 2B transcript 4: Deletion of the last 138 nucleotides of exon 4 (c.395+1G>A minigene)

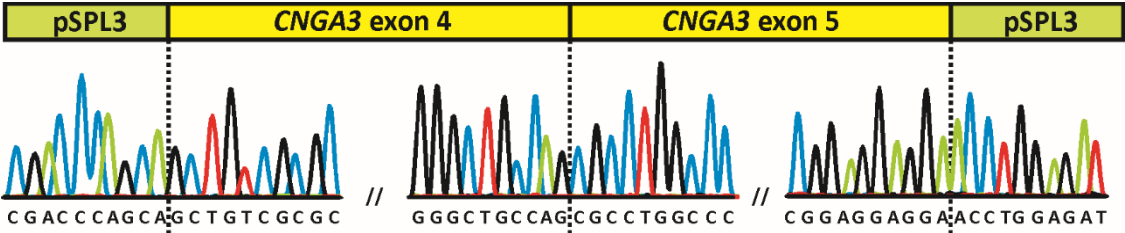

Figure 2B transcript 5: Deletion of the last 150 nucleotides of exon 4 (c.395+1G>A minigene)

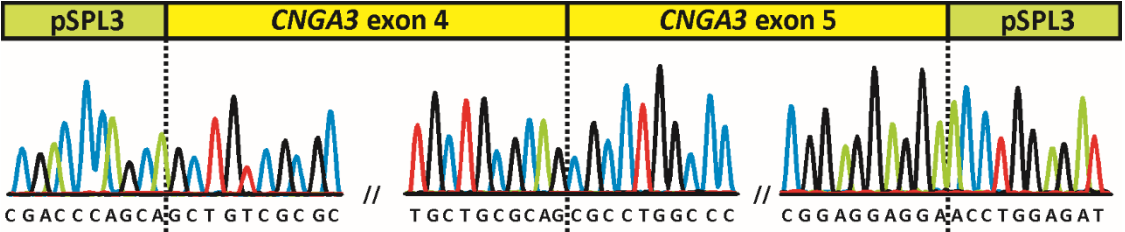

Figure 2B transcript 6: Skipping of exon 4 (c.395+1G>A minigene)

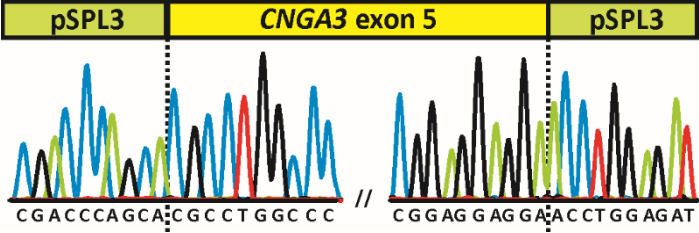

Figure 2B transcript 7: Skipping of exon 4 and exon 5 (c.395+1G>A minigene)

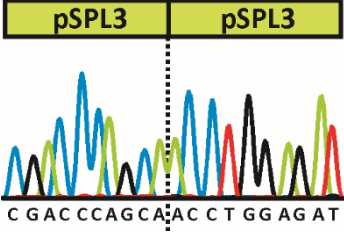

Figure 2C transcript 1: Correct splicing (exon 5 wild-type minigene)

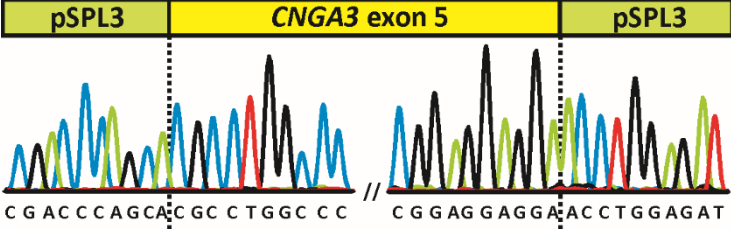

Figure 2C transcript 2: Retention of the last 10 nucleotides of intron 4 (c.396-11C>G minigene)

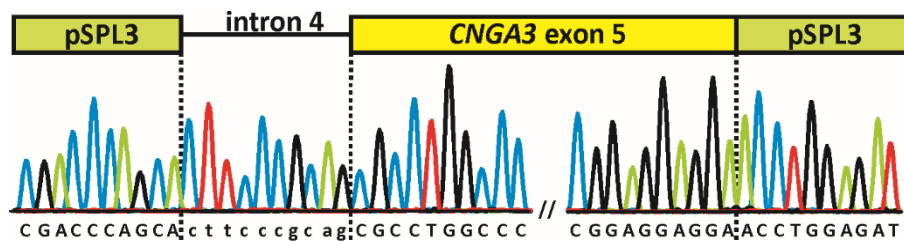

Figure 2C transcript 3: Skipping of exon 5 (c.396-11C>G minigene)

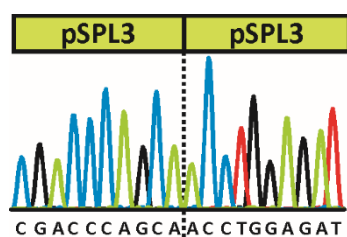

Figure 2C transcript 4: Retention of the last 4 nucleotides of intron 4 (c.396-2\_398dup minigene)

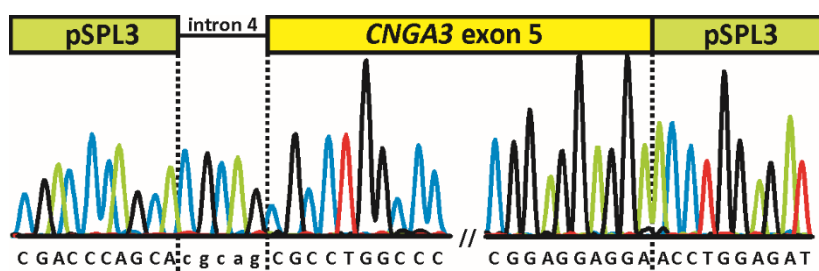

Figure 3A transcript 1: Correct splicing (exon 6 wild-type and c.450-15T>G minigenes)

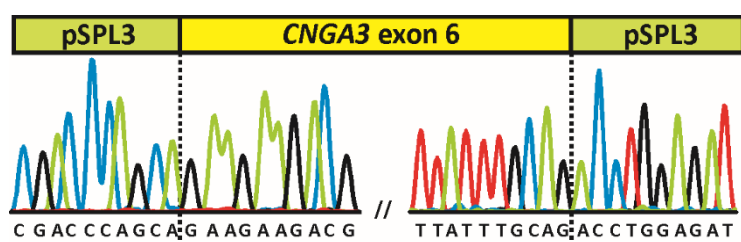

Figure 3A transcript 1: Correct splicing (c.566G>A minigene)

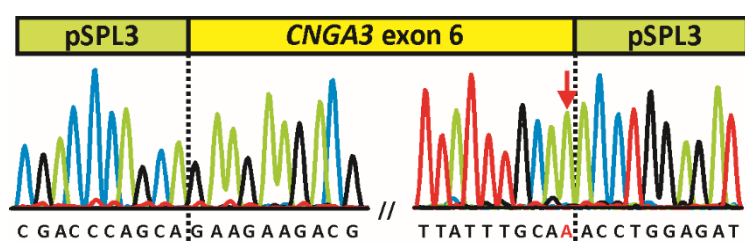

Figure 3A transcript 2: Retention of the last 14 nucleotides of intron 5 (c.450-15T>G minigene)

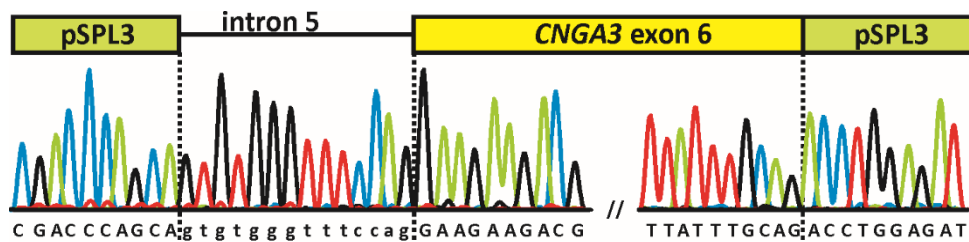

Figure 3A transcript 3: Retention of the last 49 nucleotides of intron 5 (c.450-15T>G minigene)

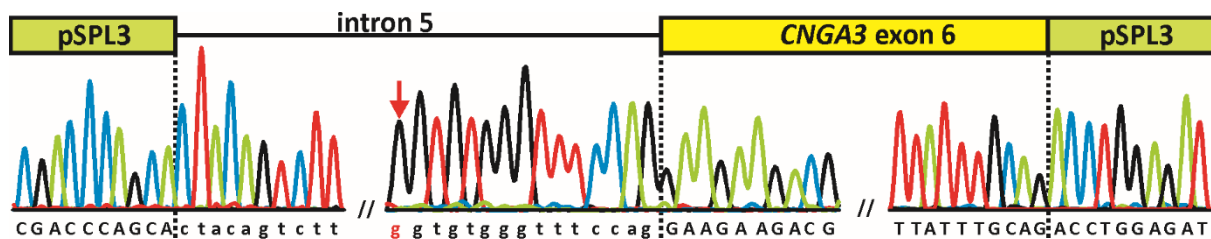

Figure 3A transcript 3: Retention of the last 49 nucleotides of intron 5 (c.450-1G>A minigene)

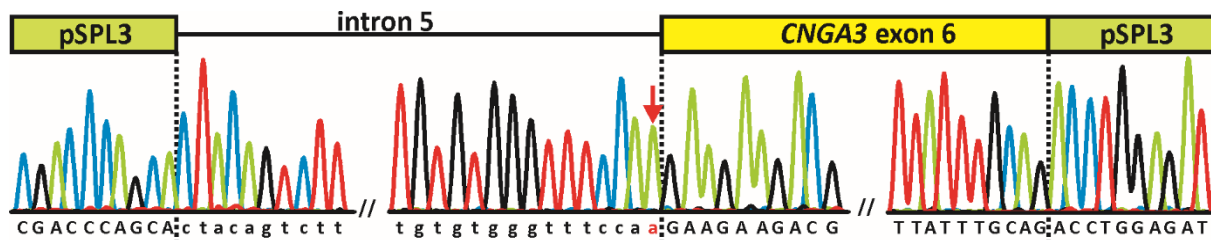

Figure 3A transcript 4: Skipping of exon 6 (c.450-15T>G and c.450-1G>A minigenes)

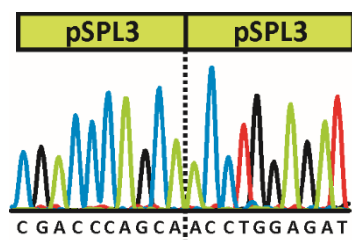

Figure 3A transcript 5: Retention of the last 154 nucleotides of intron 5 (c.450-1G>A minigene)

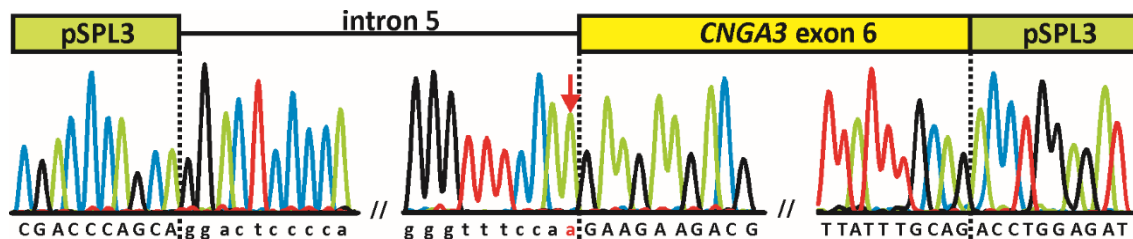

Figure 3A transcript 6: Retention of the last 70 nucleotides of intron 5 (c.450-1G>A minigene)

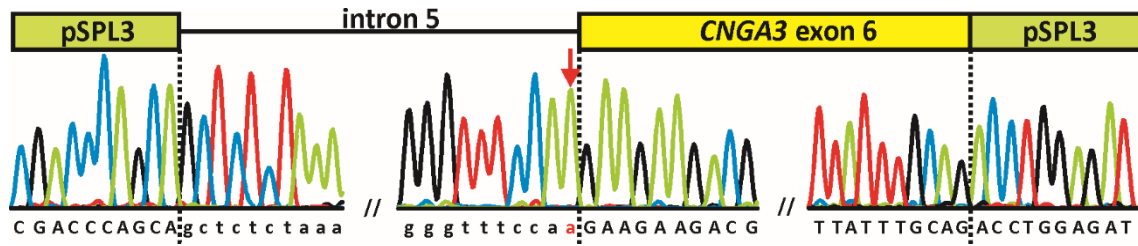

Figure 3A transcript 7: Deletion of the last 18 nucleotides of exon 6 (c.566G>A minigene)

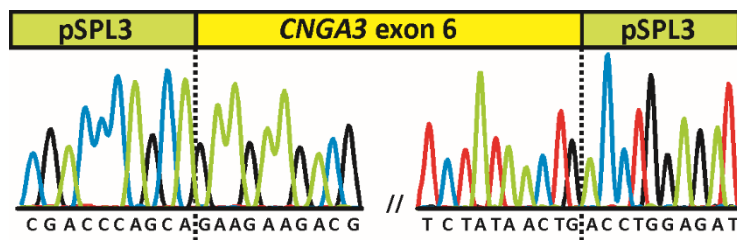

Figure 3B transcript 1: Correct splicing (exon 7 wild-type and c.673+5G>T minigenes)

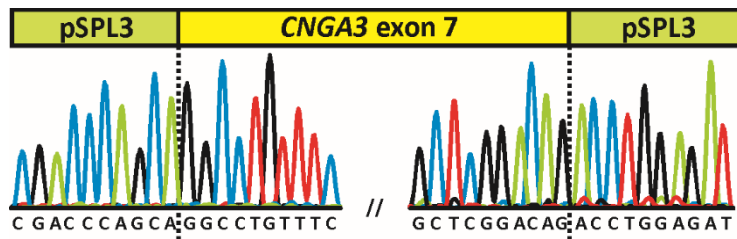

Figure 3B transcript 2: Retention of the last 9 nucleotides of intron 6 (c.567-11G>A minigene)

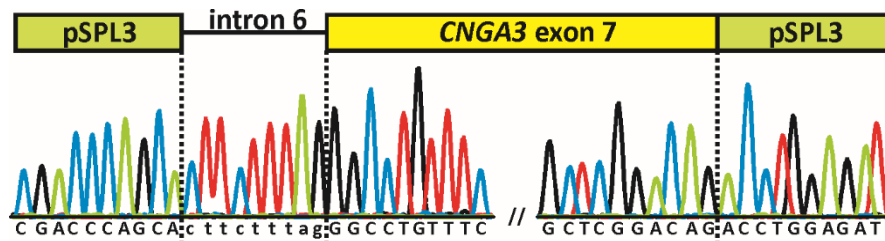

Figure 3B transcript 3: Skipping of exon 7 (c.673+5G>T minigene)

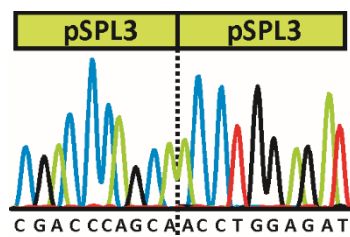



**Figure 3C transcript 1: Correct splicing (exon 8 wild-type minigene)**

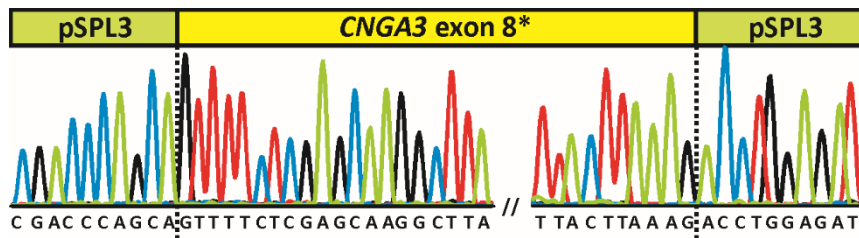

**Figure 3C transcript 2: Deletion of the first 15 nucleotides of exon 8 (c.674-2A>C minigene)**

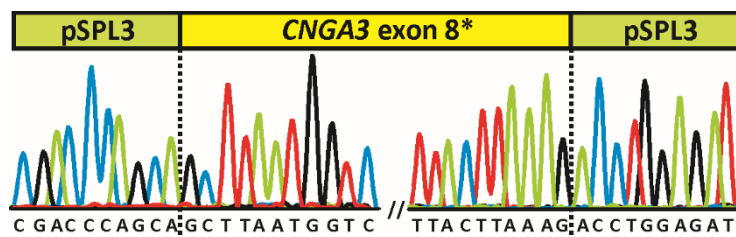

**Figure 3C transcript 3: Deletion of the first 9 nucleotides of exon 8 (c.674-2A>C minigene)**

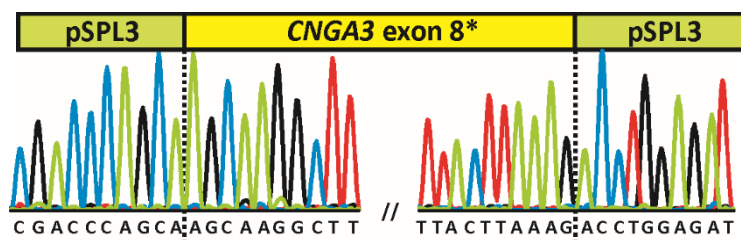

\*Note that the minigene construct for exon 8 does not comprise the full-length exon.

## Figure legends

### Supplementary Figure S1: Minigene assays of variants that showed no splice defect.

The agarose gel (uncropped image) shows the RT-PCR products obtained upon transfection of HEK293T cells with the wildtype (WT) minigene constructs for *CNGA3* exon 3 (lane 2), exon 4 (lane 5), exon 5 (lane 7), exon 6 (lane 10), and exon 7 (lane 13). Also shown are the RT-PCR products from the mutant minigene constructs harboring variants c.211G>A (lane 3), c.215+11A>G (lane 4), c.395+9C>T (lane 6), c.396-4G>A (lane 8), c.449+13A>G (lane 9), c.566+6C>T (lane 11), c.566+14G>A (lane 12), c.670A>G (lane 14), c.671C>G (lane 15), and c.671C>T (lane 16). A size standard (low molecular weight DNA ladder, NEB) is loaded in the leftmost lane. RT-PCRs from transfection with empty pSPL3 vector (lane 17) and untransfected HEK293T cells (lane 18) served as controls. NRT (lane 19), no reverse transcriptase control; NTC (lane 20), no template control. Sequence electropherograms below the agarose gel show correct splicing (i.e., splicing of the respective *CNGA3* exon between the pSPL3 resident exons) for all minigene constructs. Note that only one representative sequence electropherogram is shown for minigenes harboring the same exon.

**Supplementary Figure S2: Splice products of *CNGA3* variants inducing missplicing.** Sequence electropherograms showing the splice junctions of all subcloned transcripts presented in Figure 2 and Figure 3. The pSPL3 exons are depicted in green, the *CNGA3* exons in yellow and intronic regions as a

black line. Variants are indicated by a red arrow if present in the corresponding transcript. Exonic nucleotides are shown in upper case and intronic nucleotides in lower case.
